# Supplementary material for: Adjusting for comorbidity in incidence-based DALY calculations: an individual-based modeling approach
Source: PubMed Central journal article supplement (PMC7201540; doi:10.1186/s12874-020-00987-z), 2020-05-06
Supplement: 12874_2020_987_MOESM1_ESM.pdf [file 12874_2020_987_MOESM1_ESM.pdf]

## ADDITIONAL FILE 1

### Supplementary Tables and Figures

For the paper entitled:

*Adjusting for comorbidity in incidence-based DALY calculations: an individual-based modeling approach*

Tables of parameters for clinical progression pathways of the example diseases

**Table A1.** Simplified disease model for colorectal cancer

| Health state                          | Progression probability | Disability weight (DW) | Duration (years) | Reference                                                   |
|---------------------------------------|-------------------------|------------------------|------------------|-------------------------------------------------------------|
| Diagnosis/therapy                     | -                       | 0.288                  | 1.08             | (DW) Salomon et al., 2015<br>(D) Soerjomataram et al., 2012 |
| Pre-terminal/terminal                 | 0.44                    | 0.540                  | 0.52             | (DW) Salomon et al., 2015<br>(D) Soerjomataram et al., 2012 |
| Death following Pre-terminal/terminal | 1.0                     | -                      | -                |                                                             |

**Table A2.** Disease model for healthcare-associated pneumonia (Cassini et al., 2016; Colzani et al., 2017).

RLE = remaining life expectancy. Point estimates only were used in the simulation, and therefore as-published 95% intervals or ranges for parameter values are not shown.

| <b>Health state</b>                         | <b>Progression probability</b> | <b>Disability weight (DW)</b> | <b>Duration (years)</b> | <b>Notes</b>                              |
|---------------------------------------------|--------------------------------|-------------------------------|-------------------------|-------------------------------------------|
| Symptomatic infection                       | -                              | 0.125                         | 0.025                   |                                           |
| Severe sepsis, septic shock                 | 0.39                           | 0.655                         | 0.0315                  |                                           |
| Death following symptomatic infection       | 0.035                          | -                             | -                       |                                           |
| Post-traumatic stress disorder              | 0.17                           | 0.088                         | RLE                     |                                           |
| Cognitive impairment                        | 0.29                           | 0.043                         | RLE                     | <i>Midpoint of published range chosen</i> |
| Physical impairment                         | 1.0                            | 0.032                         | RLE                     | <i>Midpoint of published range chosen</i> |
| Renal failure and renal replacement therapy | 0.011                          | 0.259                         | RLE                     | <i>Midpoint of published range chosen</i> |

**Fig. A1.** Cumulative years lived with disability (YLD) per 1,000 cases for both cancer and HAP in a simulated cohort of 1,000 cancer patients. Overlaid with cumulative YLD computed using the unadjusted approach.

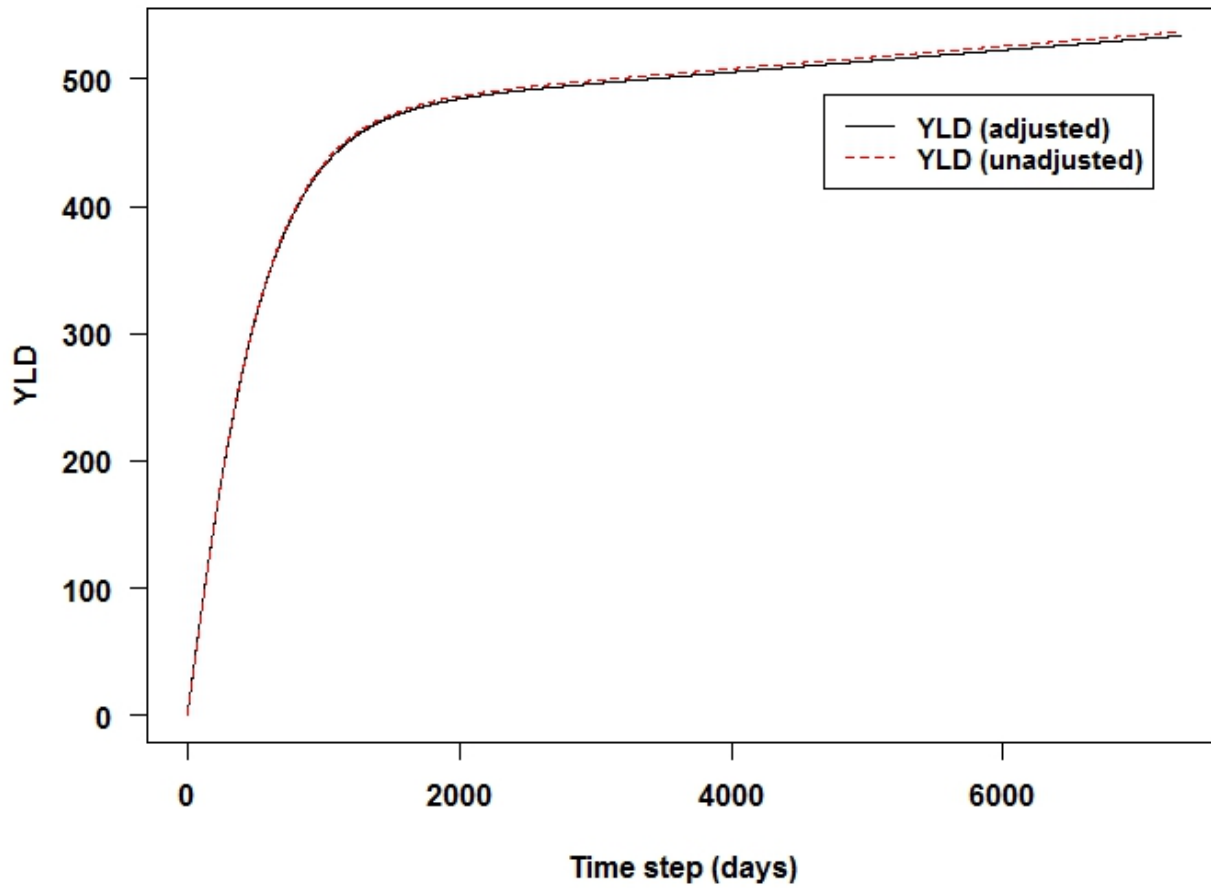

**Fig. A2.** Prevalence over time of all health states in both colorectal cancer and HAP disease models in a simulated cohort of 1,000 individuals with colorectal cancer. Time step is in days.

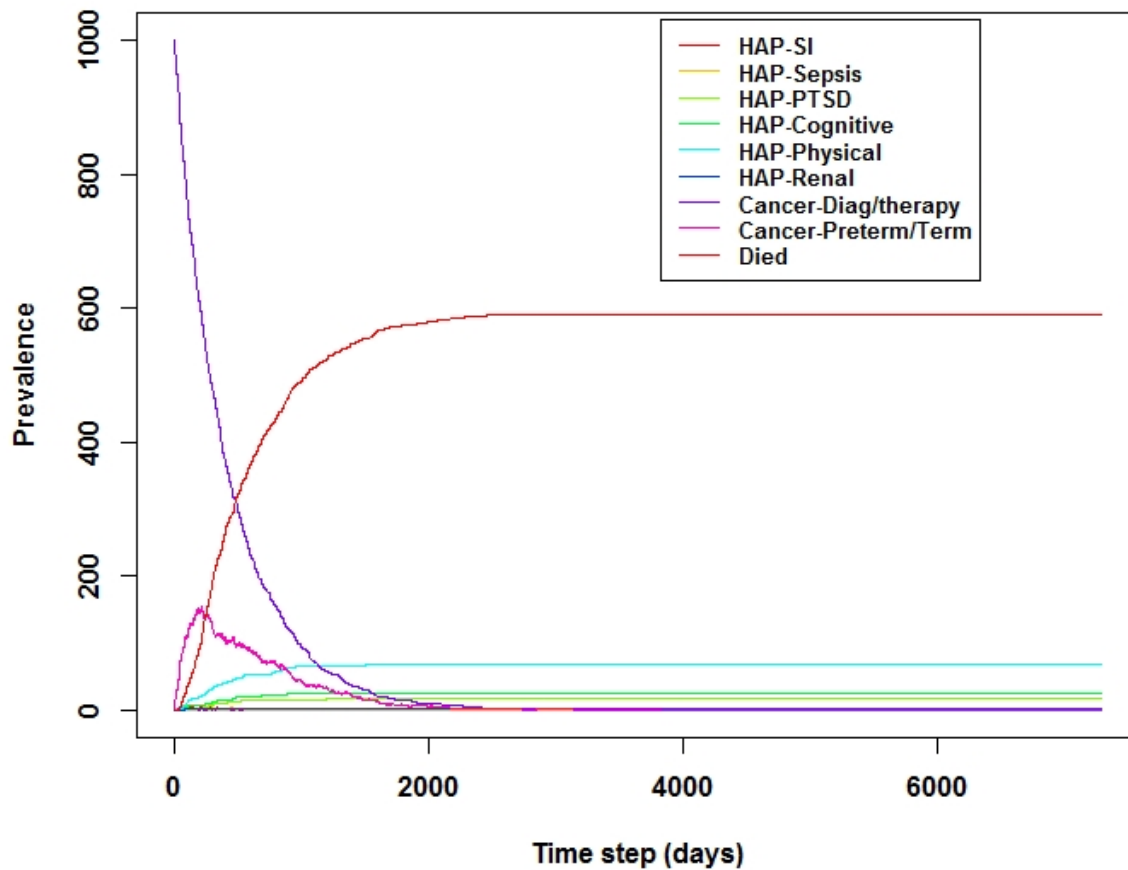

**Fig. A3.** Tornado plot showing the results of one-way sensitivity analysis conducted on five model parameters.

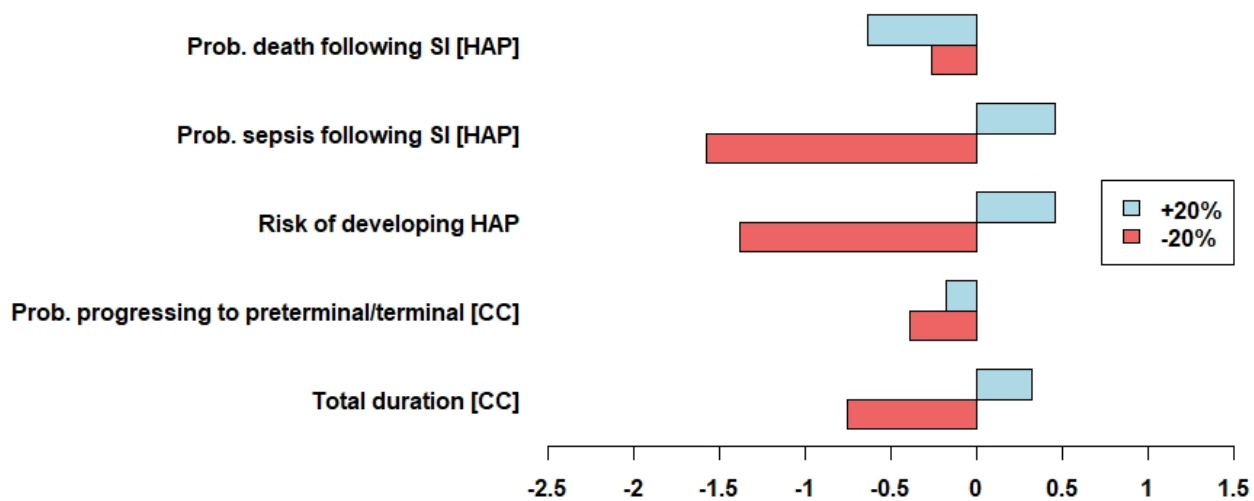

## R code

```

### DALY individual based model

library(matrixStats)
library(plyr)

set.seed(101)

## functions

# Multiplicative assumption for combining dws
dw_multi <-
function(...) {
  dw <- unlist(list(...))
  1 - prod(1 - dw)
}

dw_add <-
function(...) {
  dw <- unlist(list(...))
  sum(dw)
}

get_yld <-
function(x) {
  sum(x$dw)
}

get_yld_unadj <-
function(x) {
  sum(x$dw.unadj)
}

#### colorectal cancer and HAP

## settings
nsim <- 500      # number simulations
n <- 1000       # number of individuals
s <- 365*20     # number of time steps (in days)
mean_age <- 65  # mean age of population (years); this is arbitrary

# indices 1-6 are for health states of HAP, 7-8 for cancer
dw1 <- 0.125    # symptomatic inf (SI)
dw2 <- 0.655   # sepsis
dw3 <- 0.088   # PTSD
dw4 <- 0.043   # cognitive impairment
dw5 <- 0.032   # physical impairment
dw6 <- 0.2585  # renal failure

dw7 <- 0.288   # diagn/therapy
dw8 <- 0.540   # preterm/term

dw_all <- c(dw1, dw2, dw3, dw4, dw5, dw6, dw7, dw8)

d1 <- (0.025*365)      # SI mean duration of 9.125 days
d2 <- (0.0315*365)    # Sepsis mean duration of 11.50 days
d3 <- (20-0.025-0.0315)*365 # mean duration of (20 years minus mean duration of previous states)
d4 <- (20-0.025-0.0315)*365
d5 <- (20-0.025-0.0315)*365
d6 <- (20-0.025-0.0315)*365

d7 <- (1.08*365)      # diag/therapy: 394.2 days
d8 <- (0.52*365)     # preterm/term: 189 days

# Daily risk of developing HAP during state 7 (Cancer-Diag)
rate_HAP <- -log(1-0.12)/d7 # convert per-patient cumul risk to daily rate - ECDC point prev of 12%
among all HAIs cancer surgery
r_HAP <- 1-exp(-rate_HAP)

ctp_12 <- 0.39 # cumulative transition probability SI -> Sepsis
rate_12 <- -log(1-ctp_12)/(d1) # daily exit rate 1->2 = 0.0542
tp_12 <- 1-exp(-rate_12*1) # but, need to convert to day-level TP = 0.05272843
ctp_23 <- 0.17 # cumulative transition probability Sepsis -> PTSD
ctp_24 <- 0.29 # cumulative transition probability Sepsis -> Cogn Impair
ctp_25 <- 1.0  # cumulative transition probability Sepsis -> Phys Impair

```

```

ctp_26 <- 0.011 # cumulative transition probability Sepsis -> Renal failure
ctp_1d <- 0.035 # cumulative mortality prob. following SI
rate_1d <- -log(1-ctp_1d)/(d1)
tp_1d <- 1-exp(-rate_1d*1) # daily mort rate 1->3 = 0.00390

ctp_78 <- 0.44 # cumulative transition probability Diag/therapy -> Preterm/term
rate_78 <- -log(1-ctp_78)/(d7) # daily exit rate 7->8 = 0.00147
tp_78 <- 1-exp(-rate_78*1) # but, need to convert to day-level TP = 0.00147
rate_8d <- 1/d8 # daily mortality rate is 0.00527
tp_8d <- 1-exp(-rate_8d*1) # convert to day-level TP

# Recovery/exit probabilities based on expected rate leaving state (1/duration in state)
rate_1r <- ((1/d1) - rate_12 - rate_1d)
rp_1 <- 1-exp(-rate_1r*1) # recovery probability SI -> R
rate_2r <- (1/d2)
rp_2 <- 1-exp(-rate_2r*1) # exit probability Sepsis
rate_7r <- ((1/d7) - rate_78)
rp_7 <- 1-exp(-rate_7r*1) # recovery probability Diag/therapy -> R (cure)

# Define IBM as function
sim <- function() {

  ## initialize; 1 row for each individual
  dfr <- data.frame(age = rep(mean_age,n),
                    hs1 = FALSE,
                    hs2 = FALSE,
                    hs3 = FALSE,
                    hs4 = FALSE,
                    hs5 = FALSE,
                    hs6 = FALSE,
                    hs7 = TRUE,
                    hs8 = FALSE,
                    exit_2 = FALSE, # indicator that hs2 (Sepsis) has been exited
                    d = FALSE, # 'Died' indicator
                    dw = dw7,
                    dw.unadj = dw7)

  yld <- numeric(s) # for total YLD (both cancer & HAP)
  yld[1] <- get_yld(dfr)
  yld_unadj <- numeric(s); yld_unadj[1] <- get_yld_unadj(dfr)
  yld_cc <- numeric(s); yld_cc[1] <- sum(dfr$dw[dfr$hs7]*dfr$hs7)
  yld_cc_unadj <- numeric(s); yld_cc_unadj[1] <- sum(dfr$dw.unadj[dfr$hs7]*dfr$hs7)
  yld_hap <- numeric(s); yld_hap[1] <- 0
  yld_hap_unadj <- numeric(s); yld_hap_unadj[1] <- 0
  yld_cc_state <- matrix(0,nrow=2,ncol=s); yld_cc_state[2,1] <- 0
  yld_cc_state[1,1] <- sum(dfr$dw[dfr$hs7]*dfr$hs7)
  yld_cc_state_unadj <- matrix(0,nrow=2,ncol=s); yld_cc_state_unadj[2,1] <- 0
  yld_cc_state_unadj[1,1] <- sum(dfr$dw.unadj[dfr$hs7]*dfr$hs7)
  yld_hap_state <- matrix(0,nrow=6,ncol=s); yld_hap_state[,1] <- 0
  yld_hap_state_unadj <- matrix(0,nrow=6,ncol=s); yld_hap_state_unadj[,1] <- 0

  # Define variables useful for plotting
  prev <- matrix(0,nrow=s,ncol=9) # 9th column for 'Dead'
  prev[1,] <- c(0,0,0,0,0,0,0,n,0,0) # starting cohort is in 7th state

  ## run
  for (i in seq(2, s)) {
    ## indicator vectors; randomly determine HAP infection, progressions, deaths
    get_hs1 <- rbinom(n, 1, r_HAP) == 1
    get_hs2 <- rbinom(n, 1, tp_12) == 1
    get_hs3 <- rbinom(n, 1, ctp_23) == 1
    get_hs4 <- rbinom(n, 1, ctp_24) == 1
    get_hs5 <- rbinom(n, 1, ctp_25) == 1
    get_hs6 <- rbinom(n, 1, ctp_26) == 1
    get_d1 <- rbinom(n, 1, tp_1d) == 1
    recover_hs1 <- rbinom(n, 1, rp_1) == 1
    recover_hs2 <- rbinom(n, 1, rp_2) == 1

    get_hs8 <- rbinom(n, 1, tp_78) == 1
    get_d8 <- rbinom(n, 1, tp_8d) == 1
    recover_hs7 <- rbinom(n, 1, rp_7) == 1

    ## individuals may die if in origin state 1 (HAP-SI) or in state 8 (Cancer-Preterm/term) only
    has_1 <- dfr$hs1
    has_8 <- dfr$hs8
    dfr$d[has_1][get_d1[has_1]] <- TRUE
    dfr$d[has_8][get_d8[has_8]] <- TRUE
    dfr$hs1[has_1][get_d1[has_1]] <- FALSE
    dfr$hs8[has_8][get_d8[has_8]] <- FALSE
  }
}

```

```

## individuals may recover/exit from health states 1, 2 & 7 only
has_1 <- dfr$hs1
has_2 <- dfr$hs2
exit_2 <- dfr$exit_2
has_7 <- dfr$hs7
dfr$rhap[has_1][recover_hs1[has_1]] <- TRUE
dfr$rhap[has_2][recover_hs2[has_2]] <- TRUE
dfr$rhcc[has_7][recover_hs7[has_7]] <- TRUE
dfr$hs1[has_1][recover_hs1[has_1]] <- FALSE
dfr$exit_2 <- FALSE # reset indicator for exiting Sepsis to FALSE every
time-step
dfr$exit_2[has_2][recover_hs2[has_2]] <- TRUE # set indicator to TRUE only in time-step when exiting
state 2
dfr$hs2[has_2][recover_hs2[has_2]] <- FALSE
dfr$hs7[has_7][recover_hs7[has_7]] <- FALSE

## individuals in state 7 may acquire HAP infection
has_7 <- dfr$hs7
dfr$hs1[has_7][get_hs1[has_7]] <- TRUE

## individuals may develop health state 2 if in origin state (state 1), and may progress
## to states 3, 4, 5, or 6 only in time-step following exiting state 2
has_1 <- dfr$hs1
has_2 <- dfr$hs2
dfr$hs2[has_1][get_hs2[has_1]] <- TRUE
dfr$hs3[exit_2][get_hs3[exit_2]] <- TRUE # possibly move to state 3 only those who have just
exited state 2
dfr$hs4[exit_2][get_hs4[exit_2]] <- TRUE # same, for state 4
dfr$hs5[exit_2][get_hs5[exit_2]] <- TRUE # ... 5
dfr$hs6[exit_2][get_hs6[exit_2]] <- TRUE # ... 6
dfr$hs8[has_7][get_hs8[has_7]] <- TRUE
dfr$hs1[has_1][get_hs2[has_1]] <- FALSE # exit SI if develop Sepsis
dfr$hs7[has_7][get_hs8[has_7]] <- FALSE # exit Diag/therapy if progress to Preterm/term

## Calculate combined DW NB. 2:9 refers to column indices of 'has health-state-n' indicators
dfr_hs_dw <- t(t(dfr[, 2:9]) * dw_all)
dfr$dw <- 1 - rowProds(1 - dfr_hs_dw)
dfr$dw.unadj <- rowSums(dfr_hs_dw)

## calculate total YLD (in days) over time, also stratified by disease and by state, using decomposition
method
yld[i] <- get_yld(dfr)
denom <- (dw1*dfr$hs1 + dw2*dfr$hs2 + dw3*dfr$hs3 + dw4*dfr$hs4 + dw5*dfr$hs5 + dw6*dfr$hs6 +
dw7*dfr$hs7 + dw8*dfr$hs8)
yld_cc[i] <- sum(dfr$dw[dfr$hs7]*(dw7/denom[dfr$hs7])) + sum(dfr$dw[dfr$hs8]*(dw8/denom[dfr$hs8]))
yld_hap[i] <- sum(dfr$dw[dfr$hs1]*(dw1/denom[dfr$hs1])) + sum(dfr$dw[dfr$hs2]*(dw2/denom[dfr$hs2])) +
sum(dfr$dw[dfr$hs3]*(dw3/denom[dfr$hs3])) + sum(dfr$dw[dfr$hs4]*(dw4/denom[dfr$hs4])) +
sum(dfr$dw[dfr$hs5]*(dw5/denom[dfr$hs5])) + sum(dfr$dw[dfr$hs6]*(dw6/denom[dfr$hs6]))
yld_cc_state[1,i] <- sum(dfr$dw[dfr$hs7]*(dw7/denom[dfr$hs7]))
yld_cc_state[2,i] <- sum(dfr$dw[dfr$hs8]*(dw8/denom[dfr$hs8]))
yld_hap_state[1,i] <- sum(dfr$dw[dfr$hs1]*(dw1/denom[dfr$hs1]))
yld_hap_state[2,i] <- sum(dfr$dw[dfr$hs2]*(dw2/denom[dfr$hs2]))
yld_hap_state[3,i] <- sum(dfr$dw[dfr$hs3]*(dw3/denom[dfr$hs3]))
yld_hap_state[4,i] <- sum(dfr$dw[dfr$hs4]*(dw4/denom[dfr$hs4]))
yld_hap_state[5,i] <- sum(dfr$dw[dfr$hs5]*(dw5/denom[dfr$hs5]))
yld_hap_state[6,i] <- sum(dfr$dw[dfr$hs6]*(dw6/denom[dfr$hs6]))

yld_unadj[i] <- get_yld_unadj(dfr)
denom <- (dw1*dfr$hs1 + dw2*dfr$hs2 + dw3*dfr$hs3 + dw4*dfr$hs4 + dw5*dfr$hs5 + dw6*dfr$hs6 +
dw7*dfr$hs7 + dw8*dfr$hs8)
yld_cc_unadj[i] <- sum(dfr$dw.unadj[dfr$hs7]*(dw7/denom[dfr$hs7])) +
sum(dfr$dw.unadj[dfr$hs8]*(dw8/denom[dfr$hs8]))
yld_hap_unadj[i] <- sum(dfr$dw.unadj[dfr$hs1]*(dw1/denom[dfr$hs1])) +
sum(dfr$dw.unadj[dfr$hs2]*(dw2/denom[dfr$hs2])) +
sum(dfr$dw.unadj[dfr$hs3]*(dw3/denom[dfr$hs3])) +
sum(dfr$dw.unadj[dfr$hs4]*(dw4/denom[dfr$hs4])) +
sum(dfr$dw.unadj[dfr$hs5]*(dw5/denom[dfr$hs5])) +
sum(dfr$dw.unadj[dfr$hs6]*(dw6/denom[dfr$hs6]))
yld_cc_state_unadj[1,i] <- sum(dfr$dw.unadj[dfr$hs7]*(dw7/denom[dfr$hs7]))
yld_cc_state_unadj[2,i] <- sum(dfr$dw.unadj[dfr$hs8]*(dw8/denom[dfr$hs8]))
yld_hap_state_unadj[1,i] <- sum(dfr$dw.unadj[dfr$hs1]*(dw1/denom[dfr$hs1]))
yld_hap_state_unadj[2,i] <- sum(dfr$dw.unadj[dfr$hs2]*(dw2/denom[dfr$hs2]))
yld_hap_state_unadj[3,i] <- sum(dfr$dw.unadj[dfr$hs3]*(dw3/denom[dfr$hs3]))
yld_hap_state_unadj[4,i] <- sum(dfr$dw.unadj[dfr$hs4]*(dw4/denom[dfr$hs4]))
yld_hap_state_unadj[5,i] <- sum(dfr$dw.unadj[dfr$hs5]*(dw5/denom[dfr$hs5]))
yld_hap_state_unadj[6,i] <- sum(dfr$dw.unadj[dfr$hs6]*(dw6/denom[dfr$hs6]))

yld_cc_unadj[i] <- sum(dfr$hs7*dw7) + sum(dfr$hs8*dw8)
yld_hap_unadj[i] <- sum(dfr$hs1*dw1) + sum(dfr$hs2*dw2) + sum(dfr$hs3*dw3) + sum(dfr$hs4*dw4) +
sum(dfr$hs5*dw5) + sum(dfr$hs6*dw6)

```



```

yld_cc_state_unadj[1,i] <- sum(dfr$hs7*dw7)
yld_cc_state_unadj[2,i] <- sum(dfr$hs8*dw8)
yld_hap_state_unadj[1,i] <- sum(dfr$hs1*dw1)
yld_hap_state_unadj[2,i] <- sum(dfr$hs2*dw2)
yld_hap_state_unadj[3,i] <- sum(dfr$hs3*dw3)
yld_hap_state_unadj[4,i] <- sum(dfr$hs4*dw4)
yld_hap_state_unadj[5,i] <- sum(dfr$hs5*dw5)
yld_hap_state_unadj[6,i] <- sum(dfr$hs6*dw6)

## record state-occupation over time, to calc prevalence[=no. individuals] per state over time (for
plotting)
prev[i, ] <- colSums(dfr[, c(paste0("hs", 1:8), "d")])
}
return(list(prev,yld,yld_unadj,yld_cc,yld_cc_unadj,yld_hap,yld_hap_unadj,
            yld_cc_state,yld_cc_state_unadj,yld_hap_state,yld_hap_state_unadj)) # return also state-
specific yld
}

### Simulate
yld_total_m <- matrix(0,nrow=nsim,ncol=s) # create matrix of (nsim x total time-steps)
yld_total_unadj_m <- matrix(0,nrow=nsim,ncol=s) # create matrix of (nsim x total time-steps)
yld_cc_m <- matrix(0,nrow=nsim,ncol=s) # create matrix of (nsim x total time-steps)
yld_hap_m <- matrix(0,nrow=nsim,ncol=s)
yld_cc_unadj_m <- matrix(0,nrow=nsim,ncol=s)
yld_hap_unadj_m <- matrix(0,nrow=nsim,ncol=s)

yld_cc_state_m <- array(0,dim=c(nsim,2,s)) # 2 states
yld_cc_state_unadj_m <- array(0,dim=c(nsim,2,s))
yld_hap_state_m <- array(0,dim=c(nsim,6,s)) # 6 states
yld_hap_state_unadj_m <- array(0,dim=c(nsim,6,s))

# For totals over entire simulation period:
yld_total_median_95pc <- matrix(0,nrow=1,ncol=3)
yld_total_unadjusted_median_95pc <- matrix(0,nrow=1,ncol=3)
yld_cc_median_95pc <- matrix(0,nrow=1,ncol=3)
yld_cc_unadj_median_95pc <- matrix(0,nrow=1,ncol=3)
yld_hap_median_95pc <- matrix(0,nrow=1,ncol=3)
yld_hap_unadj_median_95pc <- matrix(0,nrow=1,ncol=3)

yld_cc_state_median_95pc <- array(0,dim=c(2,3))
yld_cc_state_unadj_median_95pc <- array(0,dim=c(2,3))
yld_hap_state_median_95pc <- array(0,dim=c(2,3))
yld_hap_state_unadj_median_95pc <- array(0,dim=c(2,3))

dd <- 365 # units days to years
returnList0 <- rlpby(nsim, sim(), .progress = "text")

for(m in 1:nsim) {
  returnList <- returnList0[[m]]

  prev <- returnList[[1]] # prevalence is from the last run only
  yld_total_m[m,] <- returnList[[2]]/dd
  yld_total_unadj_m[m,] <- returnList[[3]]/dd
  yld_cc_m[m,] <- returnList[[4]]/dd
  yld_cc_unadj_m[m,] <- returnList[[5]]/dd
  yld_hap_m[m,] <- returnList[[6]]/dd
  yld_hap_unadj_m[m,] <- returnList[[7]]/dd
  yld_cc_state_m[m,,] <- returnList[[8]]/dd
  yld_cc_state_unadj_m[m,,] <- returnList[[9]]/dd
  yld_hap_state_m[m,,] <- returnList[[10]]/dd
  yld_hap_state_unadj_m[m,,] <- returnList[[11]]/dd
}

# Calculate median and 95% UI from nsim iterations:
yld_total_median_95pc <- quantile(apply(yld_total_m,1,sum),probs=c(0.025,0.5,0.975))
yld_total_unadj_median_95pc <- quantile(apply(yld_total_unadj_m,1,sum),probs=c(0.025,0.5,0.975))
yld_cc_median_95pc <- quantile(apply(yld_cc_m,1,sum),probs=c(0.025,0.5,0.975))
yld_cc_unadj_median_95pc <- quantile(apply(yld_cc_unadj_m,1,sum),probs=c(0.025,0.5,0.975))
yld_hap_median_95pc <- quantile(apply(yld_hap_m,1,sum),probs=c(0.025,0.5,0.975))
yld_hap_unadj_median_95pc <- quantile(apply(yld_hap_unadj_m,1,sum),probs=c(0.025,0.5,0.975))
yld_cc_state_median_95pc <- t(apply(apply(yld_cc_state_m,c(1,2),sum),2,quantile,probs=c(0.025,0.5,0.975)))
yld_cc_state_unadj_median_95pc <-
t(apply(apply(yld_cc_state_unadj_m,c(1,2),sum),2,quantile,probs=c(0.025,0.5,0.975)))
yld_hap_state_median_95pc <-
t(apply(apply(yld_hap_state_m,c(1,2),sum),2,quantile,probs=c(0.025,0.5,0.975)))
yld_hap_state_unadj_median_95pc <-
t(apply(apply(yld_hap_state_unadj_m,c(1,2),sum),2,quantile,probs=c(0.025,0.5,0.975)))

```
